# Supplementary material for: Possible Modifying Effect of Hemoglobin A1c on Genetic Susceptibility to Severe Diabetic Retinopathy in Patients With Type 2 Diabetes
Source: PubMed Central journal article supplement — Invest Ophthalmol Vis Sci. 2020 Aug 5;61(10):7. doi: 10.1167/iovs.61.10.7 (PMC7441357; doi:10.1167/iovs.61.10.7), 2020-08-05
Supplement: iovs-61-10-7_s001.pdf [file iovs-61-10-7_s001.pdf]

Supplementary Table S1. Association analysis of STDR

| Nearest Gene(s)            | SNP                            | Position    | A1 | A2 | MAF      |      | OR(95%CI)        | P-value* | q-value |
|----------------------------|--------------------------------|-------------|----|----|----------|------|------------------|----------|---------|
|                            |                                |             |    |    | Non-STDR | STDR |                  |          |         |
| <i>COL5A1</i>              | <u>rs59126004</u> <sup>‡</sup> | 9:137674341 | C  | T  | 0.17     | 0.14 | 0.84 (0.71-0.98) | 0.034    | 0.798   |
| <i>IGSF21-KLHDC7A</i>      | <u>rs3007729</u>               | 1:18795255  | T  | C  | 0.32     | 0.30 | 0.87 (0.77-0.99) | 0.034    | 0.798   |
| <i>CREB5</i>               | <u>rs11765845</u>              | 7:28391142  | A  | G  | 0.29     | 0.28 | 0.87 (0.76-0.99) | 0.036    | 0.798   |
| <i>LOC728275-LOC728316</i> | <u>rs227455</u> <sup>†</sup>   | 6:165478051 | C  | T  | 0.48     | 0.47 | 0.89 (0.79-0.99) | 0.048    | 0.798   |
| <i>CCDC68-TCF4</i>         | <u>rs12607567</u> <sup>†</sup> | 18:52858659 | G  | A  | 0.47     | 0.45 | 0.89 (0.80-1.00) | 0.064    | 0.798   |
| <i>C6orf170</i>            | <u>rs17083119</u> <sup>‡</sup> | 6:121402110 | G  | A  | 0.12     | 0.10 | 0.84 (0.70-1.01) | 0.077    | 0.798   |
| <i>SLC25A32</i>            | <u>rs3098241</u> <sup>‡</sup>  | 8:104425304 | G  | A  | 0.32     | 0.30 | 0.89 (0.79-1.01) | 0.081    | 0.798   |
| <i>GRIK2</i>               | <u>rs2518344</u> <sup>†</sup>  | 6:101881867 | A  | G  | 0.10     | 0.11 | 1.14 (0.94-1.38) | 0.164    | 0.892   |
| <i>VSTM2B-POP4</i>         | <u>rs10403021</u>              | 19:30079604 | T  | C  | 0.29     | 0.30 | 1.08 (0.95-1.22) | 0.198    | 0.892   |
| <i>COX5BL1-LOC441026</i>   | <u>rs11736136</u> <sup>†</sup> | 4:83018274  | G  | A  | 0.04     | 0.04 | 1.2 (0.89-1.60)  | 0.218    | 0.892   |
| <i>NOX3-ARID1B</i>         | <u>rs10499298</u>              | 6:156175762 | T  | C  | 0.06     | 0.05 | 0.85 (0.67-1.09) | 0.221    | 0.892   |
| <i>MALRD1</i>              | <u>rs12267418</u>              | 10:19714554 | A  | G  | 0.01     | 0.02 | 1.34 (0.83-2.14) | 0.225    | 0.892   |
| <i>CNTN5</i>               | <u>rs10501943</u> <sup>†</sup> | 11:99946999 | C  | T  | 0.03     | 0.03 | 1.22 (0.87-1.71) | 0.229    | 0.892   |
| <i>KIAA0825</i>            | <u>rs13163610</u> <sup>†</sup> | 5:93548877  | C  | A  | 0.04     | 0.03 | 0.82 (0.58-1.14) | 0.246    | 0.892   |
| <i>MYTIL-LOC729897</i>     | <u>rs10199521</u> <sup>†</sup> | 2:2519513   | T  | C  | 0.35     | 0.36 | 1.06 (0.94-1.20) | 0.276    | 0.892   |
| <i>CEP135</i>              | <u>rs4865047</u> <sup>†</sup>  | 4:56821806  | T  | C  | 0.22     | 0.23 | 1.07 (0.93-1.22) | 0.323    | 0.892   |
| <i>INSR</i>                | <u>rs2115386</u> <sup>†</sup>  | 19:7196565  | C  | T  | 0.47     | 0.49 | 1.05 (0.94-1.18) | 0.325    | 0.892   |
| <i>ZNRF1</i>               | <u>rs17684886</u> <sup>†</sup> | 16:75086875 | A  | T  | 0.47     | 0.47 | 0.94 (0.84-1.06) | 0.333    | 0.892   |
| <i>COMMD6-LMO7</i>         | <u>rs7986566</u>               | 13:76197931 | C  | T  | 0.32     | 0.31 | 0.94 (0.83-1.06) | 0.336    | 0.892   |
| <i>LOC729902-NPY2R</i>     | <u>rs1902491</u> <sup>†</sup>  | 4:156055333 | C  | A  | 0.17     | 0.17 | 0.92 (0.79-1.08) | 0.343    | 0.892   |
| <i>TBC1D4</i>              | <u>rs9565164</u>               | 13:76039376 | C  | T  | 0.29     | 0.29 | 0.95 (0.84-1.07) | 0.416    | 0.892   |
| <i>COMMD6</i>              | <u>rs4643195</u>               | 13:76103840 | G  | A  | 0.30     | 0.29 | 0.95 (0.84-1.07) | 0.418    | 0.892   |
| <i>TNFSF18</i>             | <u>rs1033465</u> <sup>‡</sup>  | 1:172987730 | T  | A  | 0.03     | 0.02 | 0.86 (0.60-1.23) | 0.425    | 0.892   |
| <i>UBE2E2</i>              | <u>rs79941515</u> <sup>‡</sup> | 3:23225738  | T  | C  | 0.18     | 0.17 | 0.94 (0.81-1.09) | 0.426    | 0.892   |
| <i>TBC1D4</i>              | <u>rs7335576</u>               | 13:76043318 | G  | A  | 0.33     | 0.33 | 0.95 (0.84-1.07) | 0.439    | 0.892   |

|                         |                                |             |   |   |      |      |                  |       |       |
|-------------------------|--------------------------------|-------------|---|---|------|------|------------------|-------|-------|
| <i>MRPL14</i>           | <u>rs713050</u> <sup>†</sup>   | 6:44200107  | G | T | 0.05 | 0.05 | 0.90 (0.68-1.17) | 0.443 | 0.892 |
| <i>TNFRSF13B-MPRIP</i>  | rs11867934                     | 17:16933404 | T | C | 0.12 | 0.12 | 1.06 (0.89-1.26) | 0.452 | 0.892 |
| <i>API5</i>             | rs899036                       | 11:41682910 | G | T | 0.08 | 0.09 | 1.07 (0.88-1.31) | 0.460 | 0.892 |
| <i>ARHGAP22</i>         | rs4838605 <sup>†</sup>         | 10:49699957 | C | T | 0.10 | 0.10 | 1.07 (0.88-1.29) | 0.466 | 0.892 |
| <i>RASL11A</i>          | <u>rs1333347</u> <sup>‡</sup>  | 13:27900204 | T | C | 0.14 | 0.15 | 1.05 (0.90-1.24) | 0.492 | 0.892 |
| <i>AKT3-ZNF238</i>      | rs10927101                     | 1:244173872 | C | A | 0.29 | 0.30 | 1.04 (0.92-1.18) | 0.502 | 0.892 |
| <i>BFSP2</i>            | rs1197310 <sup>†</sup>         | 3:133128224 | T | A | 0.48 | 0.49 | 1.03 (0.92-1.16) | 0.512 | 0.892 |
| <i>MYSM1</i>            | rs2811893                      | 1:59162148  | C | T | 0.34 | 0.35 | 1.04 (0.92-1.17) | 0.516 | 0.892 |
| <i>EDIL3</i>            | rs1445754 <sup>†</sup>         | 5:83575631  | T | A | 0.05 | 0.06 | 1.08 (0.84-1.39) | 0.517 | 0.892 |
| <i>LINC01249</i>        | rs699549                       | 2:4705263   | T | C | 0.24 | 0.23 | 0.95 (0.83-1.09) | 0.519 | 0.892 |
| <i>FMN1</i>             | rs10519765 <sup>†</sup>        | 15:32993421 | A | G | 0.11 | 0.10 | 0.94 (0.78-1.13) | 0.530 | 0.892 |
| <i>MALRD1</i>           | <u>rs17670074</u> <sup>†</sup> | 10:19705383 | C | A | 0.35 | 0.34 | 0.96 (0.85-1.08) | 0.539 | 0.892 |
| <i>HS6ST3</i>           | rs16953072 <sup>†</sup>        | 13:96950313 | T | G | 0.05 | 0.05 | 0.92 (0.70-1.20) | 0.541 | 0.892 |
| <i>KRT18P34-VEPH1</i>   | rs9866141 <sup>†</sup>         | 3:156950579 | T | C | 0.08 | 0.09 | 1.05 (0.86-1.29) | 0.569 | 0.892 |
| <i>TNFSF4-LOC730070</i> | rs1342038                      | 1:173301516 | G | A | 0.42 | 0.41 | 0.96 (0.86-1.08) | 0.599 | 0.892 |
| <i>TMEM217</i>          | <u>rs1224329</u>               | 6:37288215  | G | A | 0.11 | 0.11 | 0.95 (0.79-1.14) | 0.600 | 0.892 |
| <i>LINC00511</i>        | <u>rs759563</u> <sup>‡</sup>   | 17:70370888 | T | C | 0.30 | 0.30 | 0.96 (0.85-1.09) | 0.601 | 0.892 |
| <i>CAMK4</i>            | rs2300782 <sup>†</sup>         | 5:110788785 | T | C | 0.40 | 0.41 | 1.03 (0.91-1.15) | 0.612 | 0.892 |
| <i>KIFC3</i>            | <u>rs247040</u> <sup>‡</sup>   | 16:57877310 | C | T | 0.09 | 0.09 | 0.95 (0.77-1.15) | 0.613 | 0.892 |
| <i>COLEC12</i>          | rs599019                       | 18:294495   | C | A | 0.47 | 0.47 | 1.03 (0.91-1.15) | 0.615 | 0.892 |
| <i>C5orf36</i>          | rs17376456 <sup>†</sup>        | 5:93557702  | G | A | 0.05 | 0.04 | 0.93 (0.70-1.23) | 0.645 | 0.892 |
| <i>PACRG</i>            | <u>rs2294458</u> <sup>‡</sup>  | 6:163666336 | G | T | 0.24 | 0.24 | 1.03 (0.90-1.17) | 0.654 | 0.892 |
| <i>AKT3-ZNF238</i>      | <u>rs479338</u>                | 1:244159143 | G | A | 0.28 | 0.26 | 0.97 (0.85-1.10) | 0.660 | 0.892 |
| <i>ZWINT-MRPS35P3</i>   | rs4462262                      | 10:59189178 | T | C | 0.05 | 0.06 | 1.05 (0.82-1.35) | 0.667 | 0.892 |
| <i>FABP3P2-TNFSF11</i>  | <u>rs4941432</u>               | 13:43098347 | A | G | 0.24 | 0.23 | 0.97 (0.85-1.11) | 0.670 | 0.892 |
| <i>SCYLIBP1</i>         | rs6427247 <sup>†</sup>         | 1:170380480 | G | A | 0.25 | 0.26 | 1.02 (0.90-1.16) | 0.693 | 0.892 |
| <i>PLXDC2-NEBL</i>      | rs12219125 <sup>†</sup>        | 10:20593087 | T | G | 0.10 | 0.11 | 1.03 (0.86-1.24) | 0.698 | 0.892 |
| <i>CDC42BPA</i>         | <u>rs2953655</u> <sup>‡</sup>  | 1:227554171 | T | C | 0.21 | 0.20 | 0.97 (0.84-1.12) | 0.711 | 0.892 |

|                            |                               |             |   |   |      |      |                  |       |       |
|----------------------------|-------------------------------|-------------|---|---|------|------|------------------|-------|-------|
| <i>ARL4C-SH3BP4</i>        | rs2380261 <sup>†</sup>        | 2:235641180 | A | C | 0.46 | 0.45 | 1.02 (0.91-1.14) | 0.719 | 0.892 |
| <i>PPAR11</i>              | <u>rs17836475<sup>‡</sup></u> | 12:4073544  | C | G | 0.31 | 0.30 | 0.97 (0.86-1.10) | 0.722 | 0.892 |
| <i>FSTL5</i>               | rs4470583 <sup>†</sup>        | 4:162250932 | A | G | 0.07 | 0.07 | 1.04 (0.83-1.30) | 0.724 | 0.892 |
| <i>AKAP11-FABP3P2</i>      | <u>rs117850847</u>            | 13:42909215 | A | C | 0.06 | 0.06 | 0.96 (0.75-1.22) | 0.750 | 0.908 |
| <i>RP1-90L14.1</i>         | <u>rs9362054<sup>†</sup></u>  | 6:85178268  | T | C | 0.30 | 0.31 | 1.01 (0.89-1.15) | 0.795 | 0.936 |
| <i>LRP2-BBS5</i>           | rs1399634                     | 2:170244607 | A | T | 0.37 | 0.37 | 0.98 (0.87-1.10) | 0.809 | 0.936 |
| <i>LEKRI-CCN1</i>          | rs13064954 <sup>‡</sup>       | 3:156854742 | A | G | 0.09 | 0.09 | 1.02 (0.84-1.24) | 0.833 | 0.936 |
| <i>ARHGAP22</i>            | rs11101357 <sup>†</sup>       | 10:49723300 | A | G | 0.10 | 0.10 | 1.01 (0.84-1.23) | 0.847 | 0.936 |
| <i>GRIK2</i>               | <u>rs487083<sup>†</sup></u>   | 6:102133625 | G | T | 0.05 | 0.05 | 1.02 (0.79-1.32) | 0.863 | 0.936 |
| <i>AKT3-ZNF238</i>         | rs476141                      | 1:244176424 | T | G | 0.20 | 0.20 | 0.98 (0.85-1.14) | 0.868 | 0.936 |
| <i>TINAG</i>               | rs6909083 <sup>‡</sup>        | 6:54182303  | T | C | 0.25 | 0.25 | 0.98 (0.86-1.12) | 0.868 | 0.936 |
| <i>GRB2</i>                | <u>rs9896052<sup>†</sup></u>  | 17:73418862 | C | A | 0.43 | 0.43 | 1.00 (0.89-1.13) | 0.891 | 0.946 |
| <i>MYTIL-LOC729897</i>     | <u>rs2668843</u>              | 2:2521301   | A | G | 0.20 | 0.19 | 0.99 (0.86-1.14) | 0.911 | 0.952 |
| <i>LOC729200-MAP3K7IP2</i> | rs7772697                     | 6:149435111 | C | T | 0.19 | 0.19 | 1.00 (0.86-1.16) | 0.954 | 0.972 |
| <i>KIAA1804-KCNK1</i>      | rs6662352 <sup>†</sup>        | 1:233642172 | T | G | 0.34 | 0.35 | 1.00 (0.89-1.13) | 0.958 | 0.972 |
| <i>HNMT</i>                | rs763970                      | 2:138636133 | A | C | 0.31 | 0.31 | 1.00 (0.88-1.13) | 0.976 | 0.976 |

A1, minor allele; A2, major allele; MAF, minor allele frequency; OR, odds ratio. SNPs ranked by the P-value. Chromosomal position corresponds to human reference genome hg19. OR corresponds to the minor allele. \*Adjusted for age, sex, BMI, duration of diabetes, the presence of HT and HbA1c. <sup>†</sup>Direction of effect consistent with the original report. <sup>‡</sup>Direction of effect not available in the original report. SNPs not examined in the previous study<sup>1</sup> are underlined.

#### Reference:

1. Cheung CY, Hui EY, Lee CH, et al. Impact of Genetic Loci Identified in Genome-Wide Association Studies on Diabetic Retinopathy in Chinese Patients With Type 2 Diabetes. *Invest Ophthalmol Vis Sci* 2016;57:5518-5524.

Supplementary Table S2. Association analysis of PDR

| Nearest Gene(s)        | SNP                     | Position    | A1 | A2 | MAF      |      | OR(95%CI)        | P-value*              | q-value |
|------------------------|-------------------------|-------------|----|----|----------|------|------------------|-----------------------|---------|
|                        |                         |             |    |    | Non-STDR | PDR  |                  |                       |         |
| <i>INSR</i>            | rs2115386 <sup>†</sup>  | 19:7196565  | C  | T  | 0.47     | 0.52 | 1.25 (1.06-1.47) | 5.65x10 <sup>-3</sup> | 0.190   |
| <i>UBE2E2</i>          | rs79941515 <sup>‡</sup> | 3:23225738  | T  | C  | 0.18     | 0.14 | 0.72 (0.57-0.91) | 6.75x10 <sup>-3</sup> | 0.190   |
| <i>MYTIL-LOC729897</i> | rs10199521 <sup>†</sup> | 2:2519513   | T  | C  | 0.35     | 0.39 | 1.24 (1.05-1.47) | 8.93x10 <sup>-3</sup> | 0.190   |
| <i>COL5A1</i>          | rs59126004 <sup>‡</sup> | 9:137674341 | C  | T  | 0.17     | 0.13 | 0.73 (0.57-0.93) | 0.011                 | 0.190   |
| <i>ZNRF1</i>           | rs17684886 <sup>†</sup> | 16:75086875 | A  | T  | 0.47     | 0.43 | 0.82 (0.69-0.97) | 0.022                 | 0.259   |
| <i>IGSF21-KLHDC7A</i>  | rs3007729               | 1:18795255  | T  | C  | 0.32     | 0.29 | 0.81 (0.67-0.97) | 0.023                 | 0.259   |
| <i>AKAP11-FABP3P2</i>  | rs117850847             | 13:42909215 | A  | C  | 0.06     | 0.04 | 0.65 (0.44-0.96) | 0.030                 | 0.259   |
| <i>CCDC68-TCF4</i>     | rs12607567 <sup>†</sup> | 18:52858659 | G  | A  | 0.47     | 0.44 | 0.83 (0.70-0.98) | 0.030                 | 0.259   |
| <i>KIAA0825</i>        | rs13163610 <sup>†</sup> | 5:93548877  | C  | A  | 0.04     | 0.02 | 0.62 (0.35-1.08) | 0.092                 | 0.705   |
| <i>API5</i>            | rs899036                | 11:41682910 | G  | T  | 0.08     | 0.10 | 1.25 (0.95-1.64) | 0.109                 | 0.752   |
| <i>GRB2</i>            | rs9896052               | 17:73418862 | C  | A  | 0.43     | 0.40 | 0.88 (0.75-1.04) | 0.144                 | 0.853   |
| <i>FABP3P2-TNFSF11</i> | rs4941432               | 13:43098347 | A  | G  | 0.24     | 0.21 | 0.87 (0.71-1.05) | 0.159                 | 0.853   |
| <i>C6orf170</i>        | rs17083119 <sup>‡</sup> | 6:121402110 | G  | A  | 0.12     | 0.10 | 0.82 (0.63-1.08) | 0.165                 | 0.853   |
| <i>MYTIL-LOC729897</i> | rs2668843 <sup>†</sup>  | 2:2521301   | A  | G  | 0.20     | 0.21 | 1.14 (0.94-1.38) | 0.180                 | 0.853   |
| <i>NOX3-ARID1B</i>     | rs10499298              | 6:156175762 | T  | C  | 0.06     | 0.05 | 0.78 (0.55-1.12) | 0.188                 | 0.853   |
| <i>GRIK2</i>           | rs2518344 <sup>†</sup>  | 6:101881867 | A  | G  | 0.10     | 0.11 | 1.18 (0.90-1.54) | 0.212                 | 0.853   |
| <i>COLEC12</i>         | rs599019                | 18:294495   | C  | A  | 0.47     | 0.47 | 1.10 (0.93-1.30) | 0.226                 | 0.853   |
| <i>TBC1D4</i>          | rs7335576               | 13:76043318 | G  | A  | 0.33     | 0.32 | 0.90 (0.75-1.07) | 0.233                 | 0.853   |
| <i>COMMD6-LMO7</i>     | rs7986566               | 13:76197931 | C  | T  | 0.32     | 0.31 | 0.90 (0.75-1.07) | 0.235                 | 0.853   |
| <i>CAMK4</i>           | rs2300782               | 5:110788785 | T  | C  | 0.40     | 0.39 | 0.91 (0.77-1.07) | 0.285                 | 0.923   |
| <i>SLC25A32</i>        | rs3098241 <sup>‡</sup>  | 8:104425304 | G  | A  | 0.32     | 0.31 | 0.90 (0.76-1.08) | 0.290                 | 0.923   |
| <i>KIAA1804-KCNK1</i>  | rs6662352               | 1:233642172 | T  | G  | 0.34     | 0.33 | 0.91 (0.77-1.09) | 0.338                 | 0.923   |
| <i>MYSM1</i>           | rs2811893               | 1:59162148  | C  | T  | 0.34     | 0.36 | 1.08 (0.91-1.27) | 0.369                 | 0.923   |
| <i>VSTM2B-POP4</i>     | rs10403021              | 19:30079604 | T  | C  | 0.29     | 0.29 | 1.07 (0.90-1.28) | 0.402                 | 0.923   |
| <i>LOC729902-NPY2R</i> | rs1902491 <sup>†</sup>  | 4:156055333 | C  | A  | 0.17     | 0.17 | 0.91 (0.73-1.13) | 0.416                 | 0.923   |

|                            |                         |             |   |   |      |      |                  |       |       |
|----------------------------|-------------------------|-------------|---|---|------|------|------------------|-------|-------|
| <i>FSTL5</i>               | rs4470583               | 4:162250932 | A | G | 0.07 | 0.07 | 0.87 (0.62-1.21) | 0.419 | 0.923 |
| <i>CEP135</i>              | rs4865047 <sup>†</sup>  | 4:56821806  | T | C | 0.22 | 0.23 | 1.08 (0.88-1.31) | 0.439 | 0.923 |
| <i>COMMD6</i>              | rs4643195               | 13:76103840 | G | A | 0.30 | 0.29 | 0.93 (0.78-1.11) | 0.448 | 0.923 |
| <i>LOC728275-LOC728316</i> | rs227455 <sup>†</sup>   | 6:165478051 | C | T | 0.48 | 0.48 | 0.94 (0.80-1.10) | 0.453 | 0.923 |
| <i>ARHGAP22</i>            | rs11101357              | 10:49723300 | A | G | 0.10 | 0.09 | 0.89 (0.67-1.19) | 0.454 | 0.923 |
| <i>MALRD1</i>              | rs12267418              | 10:19714554 | A | G | 0.01 | 0.01 | 1.28 (0.65-2.50) | 0.465 | 0.923 |
| <i>PPAR11</i>              | rs17836475 <sup>‡</sup> | 12:4073544  | C | G | 0.31 | 0.32 | 1.06 (0.89-1.26) | 0.480 | 0.923 |
| <i>AKT3-ZNF238</i>         | rs10927101              | 1:244173872 | C | A | 0.29 | 0.30 | 1.05 (0.88-1.26) | 0.527 | 0.923 |
| <i>COX5BL1-LOC441026</i>   | rs11736136 <sup>†</sup> | 4:83018274  | G | A | 0.04 | 0.04 | 1.13 (0.76-1.70) | 0.528 | 0.923 |
| <i>TNFRSF13B-MPRIP</i>     | rs11867934 <sup>†</sup> | 17:16933404 | T | C | 0.12 | 0.11 | 0.92 (0.71-1.19) | 0.538 | 0.923 |
| <i>CNTN5</i>               | rs10501943 <sup>†</sup> | 11:99946999 | C | T | 0.03 | 0.03 | 1.16 (0.71-1.89) | 0.542 | 0.923 |
| <i>LINC00511</i>           | rs759563 <sup>‡</sup>   | 17:70370888 | T | C | 0.30 | 0.31 | 0.94 (0.79-1.13) | 0.555 | 0.923 |
| <i>TNFSF4-LOC730070</i>    | rs1342038 <sup>†</sup>  | 1:173301516 | G | A | 0.42 | 0.43 | 1.04 (0.89-1.23) | 0.571 | 0.923 |
| <i>Bfsp2</i>               | rs1197310               | 3:133128224 | T | A | 0.48 | 0.48 | 0.95 (0.81-1.12) | 0.597 | 0.923 |
| <i>AKT3-ZNF238</i>         | rs479338                | 1:244159143 | G | A | 0.28 | 0.25 | 0.95 (0.79-1.14) | 0.611 | 0.923 |
| <i>PACRG</i>               | rs2294458 <sup>‡</sup>  | 6:163666336 | G | T | 0.24 | 0.23 | 1.05 (0.86-1.27) | 0.614 | 0.923 |
| <i>LOC729200-MAP3K7IP2</i> | rs7772697 <sup>†</sup>  | 6:149435111 | C | T | 0.19 | 0.18 | 0.94 (0.76-1.17) | 0.622 | 0.923 |
| <i>TBC1D4</i>              | rs9565164               | 13:76039376 | C | T | 0.29 | 0.29 | 0.95 (0.80-1.14) | 0.635 | 0.923 |
| <i>LEKRI-CCN1</i>          | rs13064954 <sup>‡</sup> | 3:156854742 | A | G | 0.09 | 0.09 | 0.93 (0.70-1.24) | 0.654 | 0.923 |
| <i>RASL11A</i>             | rs1333347 <sup>‡</sup>  | 13:27900204 | T | C | 0.14 | 0.16 | 1.05 (0.83-1.32) | 0.662 | 0.923 |
| <i>CREB5</i>               | rs11765845              | 7:28391142  | A | G | 0.29 | 0.29 | 0.96 (0.80-1.15) | 0.670 | 0.923 |
| <i>GRIK2</i>               | rs487083 <sup>†</sup>   | 6:102133625 | G | T | 0.05 | 0.06 | 1.07 (0.75-1.53) | 0.688 | 0.923 |
| <i>ZWINT-MRPS35P3</i>      | rs4462262               | 10:59189178 | T | C | 0.05 | 0.06 | 1.07 (0.75-1.52) | 0.697 | 0.923 |
| <i>EDIL3</i>               | rs1445754 <sup>†</sup>  | 5:83575631  | T | A | 0.05 | 0.06 | 1.06 (0.74-1.52) | 0.715 | 0.923 |
| <i>FMN1</i>                | rs476141 <sup>†</sup>   | 15:32993421 | A | G | 0.11 | 0.10 | 0.95 (0.73-1.24) | 0.737 | 0.923 |
| <i>AKT3-ZNF238</i>         | rs10519765 <sup>†</sup> | 1:244176424 | T | G | 0.20 | 0.20 | 1.03 (0.84-1.26) | 0.737 | 0.923 |
| <i>KIFC3</i>               | rs247040 <sup>‡</sup>   | 16:57877310 | C | T | 0.09 | 0.09 | 0.95 (0.72-1.25) | 0.750 | 0.923 |
| <i>ARL4C-SH3BP4</i>        | rs2380261               | 2:235641180 | A | C | 0.46 | 0.43 | 0.97 (0.82-1.14) | 0.752 | 0.923 |

|                       |                                |             |   |   |      |      |                  |       |       |
|-----------------------|--------------------------------|-------------|---|---|------|------|------------------|-------|-------|
| <i>TINAG</i>          | rs6909083 <sup>‡</sup>         | 6:54182303  | T | C | 0.25 | 0.25 | 1.03 (0.85-1.23) | 0.752 | 0.923 |
| <i>MALRD1</i>         | <u>rs17670074</u> <sup>†</sup> | 10:19705383 | C | A | 0.35 | 0.34 | 0.97 (0.82-1.15) | 0.755 | 0.923 |
| <i>CDC42BPA</i>       | <u>rs2953655</u> <sup>‡</sup>  | 1:227554171 | T | C | 0.21 | 0.20 | 0.96 (0.79-1.18) | 0.759 | 0.923 |
| <i>RP1-90L14.1</i>    | <u>rs9362054</u>               | 6:85178268  | T | C | 0.30 | 0.31 | 0.97 (0.81-1.16) | 0.768 | 0.923 |
| <i>SCYL1BP1</i>       | rs6427247 <sup>†</sup>         | 1:170380480 | G | A | 0.25 | 0.25 | 1.02 (0.85-1.23) | 0.776 | 0.923 |
| <i>HNMT</i>           | rs763970 <sup>†</sup>          | 2:138636133 | A | C | 0.31 | 0.31 | 0.98 (0.82-1.16) | 0.847 | 0.952 |
| <i>PLXDC2-NEBL</i>    | rs12219125 <sup>†</sup>        | 10:20593087 | T | G | 0.10 | 0.11 | 1.02 (0.79-1.33) | 0.849 | 0.952 |
| <i>C5orf36</i>        | rs17376456                     | 5:93557702  | G | A | 0.05 | 0.04 | 1.03 (0.69-1.53) | 0.869 | 0.952 |
| <i>LINC01249</i>      | rs699549 <sup>†</sup>          | 2:4705263   | T | C | 0.24 | 0.23 | 1.01 (0.83-1.23) | 0.873 | 0.952 |
| <i>TNFSF18</i>        | <u>rs1033465</u> <sup>‡</sup>  | 1:172987730 | T | A | 0.03 | 0.03 | 1.04 (0.63-1.70) | 0.878 | 0.952 |
| <i>ARHGAP22</i>       | rs4838605 <sup>†</sup>         | 10:49699957 | C | T | 0.10 | 0.09 | 1.02 (0.77-1.35) | 0.884 | 0.952 |
| <i>TMEM217</i>        | <u>rs1224329</u>               | 6:37288215  | G | A | 0.11 | 0.11 | 0.98 (0.76-1.27) | 0.899 | 0.952 |
| <i>KRT18P34-VEPH1</i> | rs9866141                      | 3:156950579 | T | C | 0.08 | 0.09 | 0.98 (0.74-1.30) | 0.921 | 0.952 |
| <i>LRP2-BBS5</i>      | rs1399634                      | 2:170244607 | A | T | 0.37 | 0.38 | 0.99 (0.84-1.17) | 0.933 | 0.952 |
| <i>MRPL14</i>         | <u>rs713050</u> <sup>†</sup>   | 6:44200107  | G | T | 0.05 | 0.05 | 0.98 (0.68-1.42) | 0.945 | 0.952 |
| <i>HS6ST3</i>         | rs16953072 <sup>†</sup>        | 13:96950313 | T | G | 0.05 | 0.05 | 0.98 (0.68-1.43) | 0.952 | 0.952 |

A1, minor allele; A2, major allele; MAF, minor allele frequency; OR, odds ratio. SNPs ranked by the P-value. Chromosomal position corresponds to human reference genome hg19. OR corresponds to the minor allele. \*Adjusted for age, sex, BMI, duration of diabetes, the presence of HT and HbA1c. <sup>†</sup>Direction of effect consistent with the original report. <sup>‡</sup>Direction of effect not available in the original report. SNPs not examined in the previous study<sup>1</sup> are underlined.

#### Reference:

1. Cheung CY, Hui EY, Lee CH, et al. Impact of Genetic Loci Identified in Genome-Wide Association Studies on Diabetic Retinopathy in Chinese Patients With Type 2 Diabetes. *Invest Ophthalmol Vis Sci* 2016;57:5518-5524.
